# Supplementary material
Source: PubMed Central journal article supplement (PMC3426889)
Supplement: Supp_Data.pdf [file Supp_Data.pdf]

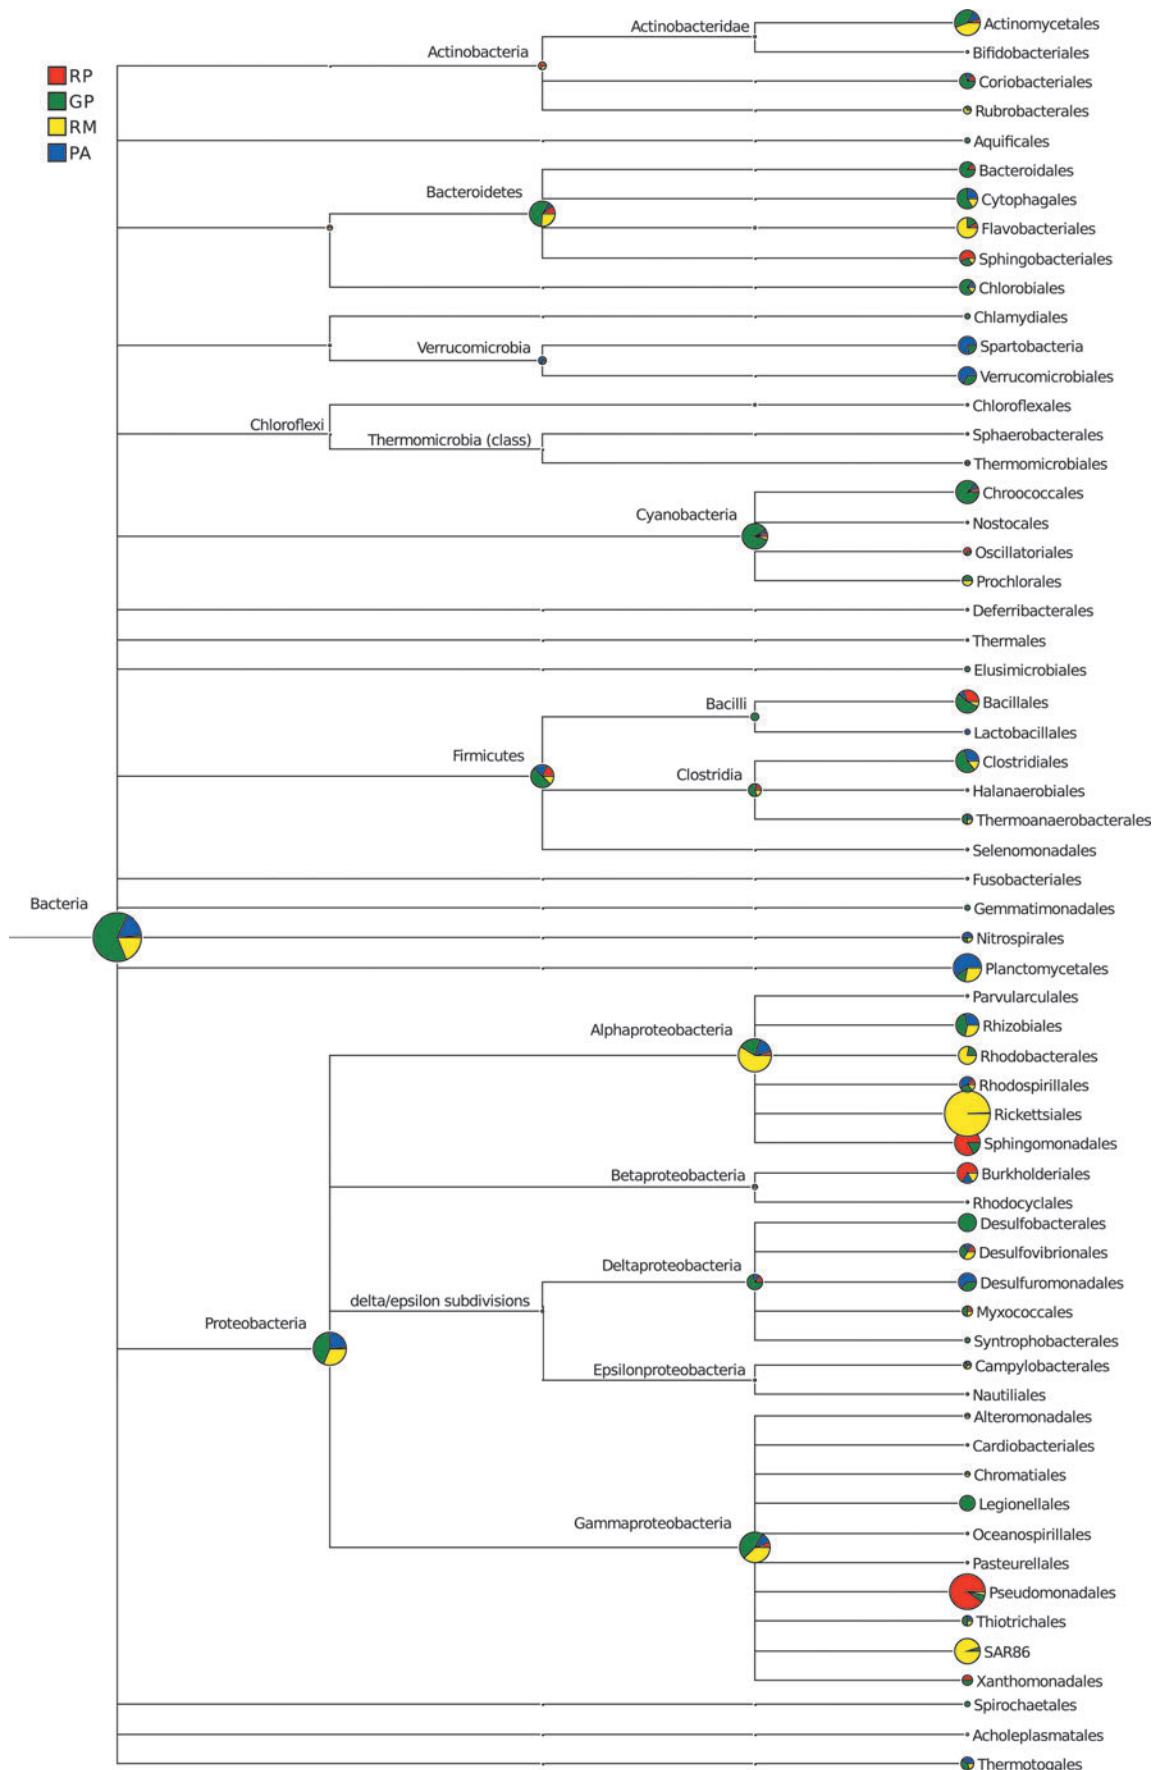

FIG. S1. Phylogram depicting the relative abundances at order level of the four CCB metagenomes according to the protein-coding gene abundance matrices.

16S rRNA gene clone library microbial diversity of several organosedimentary microbial communities including recently published studies on microbial mats, stromatolites and evaporites.

| Name                  | System                  | Origin                   | ID % | Clones | OTUs | Chao | Reference                       |
|-----------------------|-------------------------|--------------------------|------|--------|------|------|---------------------------------|
| <b>AbuDhabi-L</b>     | Intertidal mat          | Sabkha, Arabian Gulf     | 97   | 105    | 51   | NA   | <i>Abed et al., 2007</i>        |
| <b>AbuDhabi-M</b>     | Intertidal mat          | Sabkha, Arabian Gulf     | 97   | 116    | 39   | NA   | <i>Abed et al., 2007</i>        |
| <b>AbuDhabi-U</b>     | Intertidal mat          | Sabkha, Arabian Gulf     | 97   | 112    | 58   | NA   | <i>Abed et al., 2007</i>        |
| <b>SharkBay-S</b>     | Hypersaline mat         | Shark Bay, Australia     | 97   | 111    | 109  | 6216 | <i>Allen et al., 2009</i>       |
| <b>SharkBay-S</b>     | Hypersaline mat         | Shark Bay, Australia     | 99   | 111    | 111  | 1999 | <i>Allen et al., 2009</i>       |
| <b>SharkBay-P</b>     | Hypersaline mat         | Shark Bay, Australia     | 97   | 111    | 110  | 3053 | <i>Allen et al., 2009</i>       |
| <b>SharkBay-P</b>     | Hypersaline mat         | Shark Bay, Australia     | 99   | 111    | 110  | 3053 | <i>Allen et al., 2009</i>       |
| <b>Arctic-W</b>       | Ice Shelf mat           | Canadian High Arctic     | 98   | 128    | 52   | 106  | <i>Bottos et al., 2008</i>      |
| <b>Arctic-M</b>       | Ice Shelf mat           | Canadian High Arctic     | 98   | 189    | 105  | 243  | <i>Bottos et al., 2008</i>      |
| <b>GuerreroNegro</b>  | Hypersaline mat         | Guerrero Negro, México   | 99   | 1586   | 752  | 1000 | <i>Ley et al., 2006</i>         |
| <b>CCC-PG</b>         | Oligotrophic mat        | Cuatrociénegas, México   | 99   | 354    | 342  | 4034 | <i>This work</i>                |
| <b>CCC-PG</b>         | Oligotrophic mat        | Cuatrociénegas, México   | 97   | 354    | 287  | 1337 | <i>This work</i>                |
| <b>CCC-PR</b>         | Oligotrophic mat        | Cuatrociénegas, México   | 99   | 371    | 89   | 176  | <i>This work</i>                |
| <b>CCC-PR</b>         | Oligotrophic mat        | Cuatrociénegas, México   | 97   | 371    | 40   | 65   | <i>This work</i>                |
| <b>CCC-PE</b>         | Oligotrophic mat        | Cuatrociénegas, México   | 99   | 154    | 66   | 97   | <i>This work</i>                |
| <b>CCC-PE</b>         | Oligotrophic mat        | Cuatrociénegas, México   | 97   | 154    | 45   | 73   | <i>This work</i>                |
| <b>SharkBay-I</b>     | Intertidal Stromatolite | Shark Bay, Australia     | 99   | 35     | 33   | 46   | <i>Burns et al., 2004</i>       |
| <b>HamelinPool-DS</b> | Intertidal Stromatolite | Hameling Pool, Australia | 99   | 192    | 71   | 178  | <i>Papineau et al., 2005</i>    |
| <b>HamelinPool-DS</b> | Intertidal Stromatolite | Hameling Pool, Australia | 97   | 192    | 61   | 117  | <i>Papineau et al., 2005</i>    |
| <b>HamelinPool-DI</b> | Intertidal Stromatolite | Hameling Pool, Australia | 99   | 192    | 124  | 505  | <i>Papineau et al., 2005</i>    |
| <b>HamelinPool-DI</b> | Intertidal Stromatolite | Hameling Pool, Australia | 97   | 192    | 111  | 314  | <i>Papineau et al., 2005</i>    |
| <b>HamelinPool-R</b>  | Intertidal Stromatolite | Hameling Pool, Australia | 99   | 192    | 90   | 566  | <i>Papineau et al., 2005</i>    |
| <b>HamelinPool-R</b>  | Intertidal Stromatolite | Hameling Pool, Australia | 97   | 192    | 66   | 288  | <i>Papineau et al., 2005</i>    |
| <b>HighborneCay-1</b> | Subtidal Stromatolites  | Exumas, Bahamas          | 97   | 251    | 128  | 229  | <i>Baumgartner et al., 2009</i> |
| <b>HighborneCay-2</b> | Subtidal Stromatolites  | Exumas, Bahamas          | 97   | 251    | 133  | 274  | <i>Baumgartner et al., 2009</i> |
| <b>HighborneCay-3</b> | Subtidal Stromatolites  | Exumas, Bahamas          | 97   | 350    | 181  | 398  | <i>Baumgartner et al., 2009</i> |
| <b>HighborneCay-N</b> | Intertidal Stromatolite | Exumas, Bahamas          | 97   | NA     | 172  | NA   | <i>Havemann et al., 2009</i>    |
| <b>GuerreroEv-06</b>  | Endoevaporitic          | Guerrero Negro, México   | 97   | 442    | 189  | 1240 | <i>Sahl et al., 2008</i>        |
| <b>GuerreroEv-05</b>  | Endoevaporitic          | Guerrero Negro, México   | 97   | 277    | 158  | 911  | <i>Sahl et al., 2008</i>        |
| <b>LindseyLake03</b>  | Endoevaporitic          | Lindsey Lake, NM         | 97   | 328    | 110  | 413  | <i>Sahl et al., 2008</i>        |

FIG. S2. Supplementary tables of (a) species richness according to 16S rRNA clone libraries in previously published microbial mat studies; (b) relative frequency distributions of reads assigned to most-abundant orders according to the all-read metagenomic content.

Relative frequency distributions of reads assigned to most abundant orders by means of the all-reads metagenomic complement approach for the Green Mat (G), Red Mat (R), Guerrero Negro mat (GN) and Pozas Azules Stromatolite (PA). Different shades of gray are used to remark high frequency (>0.1, dark gray), medium frequency (>0.03, medium gray), and very low frequency (<0.003, light gray) of particular taxonomic groups.

|                         | G     | GN    | PA    | R     |
|-------------------------|-------|-------|-------|-------|
| Chroococcales           | 0.084 | 0.048 | 0.088 | 0.043 |
| Clostridiales           | 0.056 | 0.049 | 0.022 | 0.016 |
| Bacillales              | 0.037 | 0.029 | 0.020 | 0.051 |
| Burkholderiales         | 0.037 | 0.030 | 0.067 | 0.126 |
| Nostocales              | 0.036 | 0.030 | 0.045 | 0.030 |
| Rhizobiales             | 0.035 | 0.054 | 0.068 | 0.037 |
| Actinomycetales         | 0.035 | 0.045 | 0.029 | 0.020 |
| Pseudomonadales         | 0.034 | 0.016 | 0.015 | 0.326 |
| Bacteroidales           | 0.032 | 0.034 | 0.013 | 0.013 |
| Flavobacteriales        | 0.029 | 0.025 | 0.019 | 0.022 |
| Oscillatoriales         | 0.028 | 0.033 | 0.032 | 0.038 |
| Alteromonadales         | 0.026 | 0.017 | 0.012 | 0.014 |
| Enterobacteriales       | 0.026 | 0.014 | 0.013 | 0.027 |
| Legionellales           | 0.023 | 0.002 | 0.006 | 0.001 |
| Cytophagales            | 0.022 | 0.016 | 0.017 | 0.011 |
| Desulfuromonadales      | 0.021 | 0.027 | 0.018 | 0.005 |
| Chlorobiales            | 0.019 | 0.014 | 0.012 | 0.004 |
| Desulfovibrionales      | 0.017 | 0.024 | 0.007 | 0.005 |
| Sphingobacteriales      | 0.016 | 0.014 | 0.016 | 0.011 |
| Chloroflexales          | 0.016 | 0.023 | 0.015 | 0.005 |
| Rhodobacteriales        | 0.015 | 0.081 | 0.026 | 0.015 |
| Planctomycetales        | 0.015 | 0.031 | 0.112 | 0.003 |
| Thermoanaerobacteriales | 0.014 | 0.015 | 0.007 | 0.004 |
| Chromatiales            | 0.014 | 0.014 | 0.009 | 0.004 |
| Myxococcales            | 0.013 | 0.021 | 0.020 | 0.004 |
| Vibrionales             | 0.012 | 0.007 | 0.006 | 0.006 |
| Desulfobacteriales      | 0.012 | 0.021 | 0.004 | 0.004 |
| Lactobacillales         | 0.012 | 0.006 | 0.004 | 0.003 |
| Rhodospirillales        | 0.011 | 0.015 | 0.015 | 0.008 |
| Oceanospirillales       | 0.010 | 0.007 | 0.006 | 0.007 |
| Spirochaetales          | 0.009 | 0.013 | 0.004 | 0.002 |
| Campylobacteriales      | 0.008 | 0.003 | 0.003 | 0.002 |
| Syntrophobacteriales    | 0.008 | 0.011 | 0.007 | 0.002 |
| Xanthomonadales         | 0.007 | 0.006 | 0.008 | 0.010 |
| Pasteurellales          | 0.007 | 0.003 | 0.003 | 0.002 |
| Rickettsiales           | 0.007 | 0.002 | 0.004 | 0.001 |
| Thiotrichales           | 0.006 | 0.003 | 0.002 | 0.001 |
| Neisseriales            | 0.006 | 0.003 | 0.004 | 0.004 |
| Chlamydiales            | 0.006 | 0.002 | 0.003 | 0.000 |
| Sphingomonadales        | 0.005 | 0.007 | 0.011 | 0.047 |
| Prochlorales            | 0.005 | 0.001 | 0.004 | 0.001 |
| Gloeobacteriales        | 0.005 | 0.003 | 0.006 | 0.001 |
| Verrucomicrobiales      | 0.005 | 0.006 | 0.028 | 0.001 |
| Nitrospirales           | 0.003 | 0.002 | 0.020 | 0.000 |
| Thermotogales           | 0.001 | 0.007 | 0.002 | 0.001 |

FIG. S2. (Continued).

Reads from Green Mat Metagenome Recruited to  
*Anabaena variabilis* PCC 7420 genome

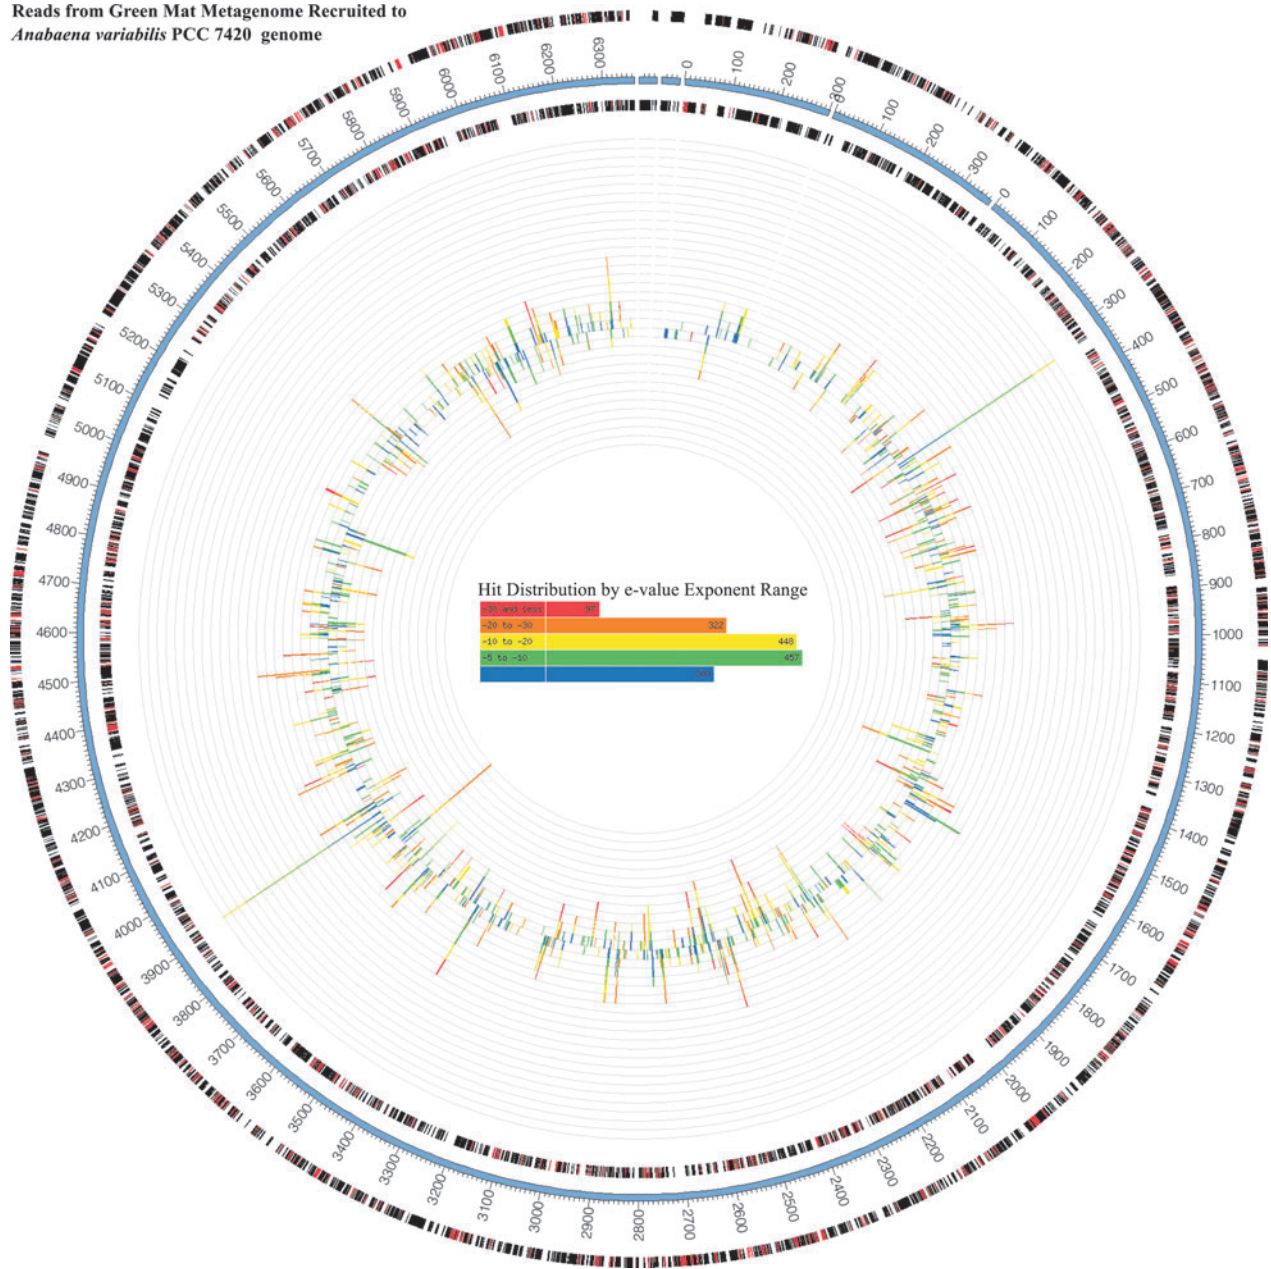

FIG. S3. Fragment recruitment diagrams of the reference genomes recruiting the highest amount of reads from the green and red mats' metagenomes.

Reads from Green Mat Metagenome Recruited to  
*Microcoleus chthonoplastes* PCC 7420 genome

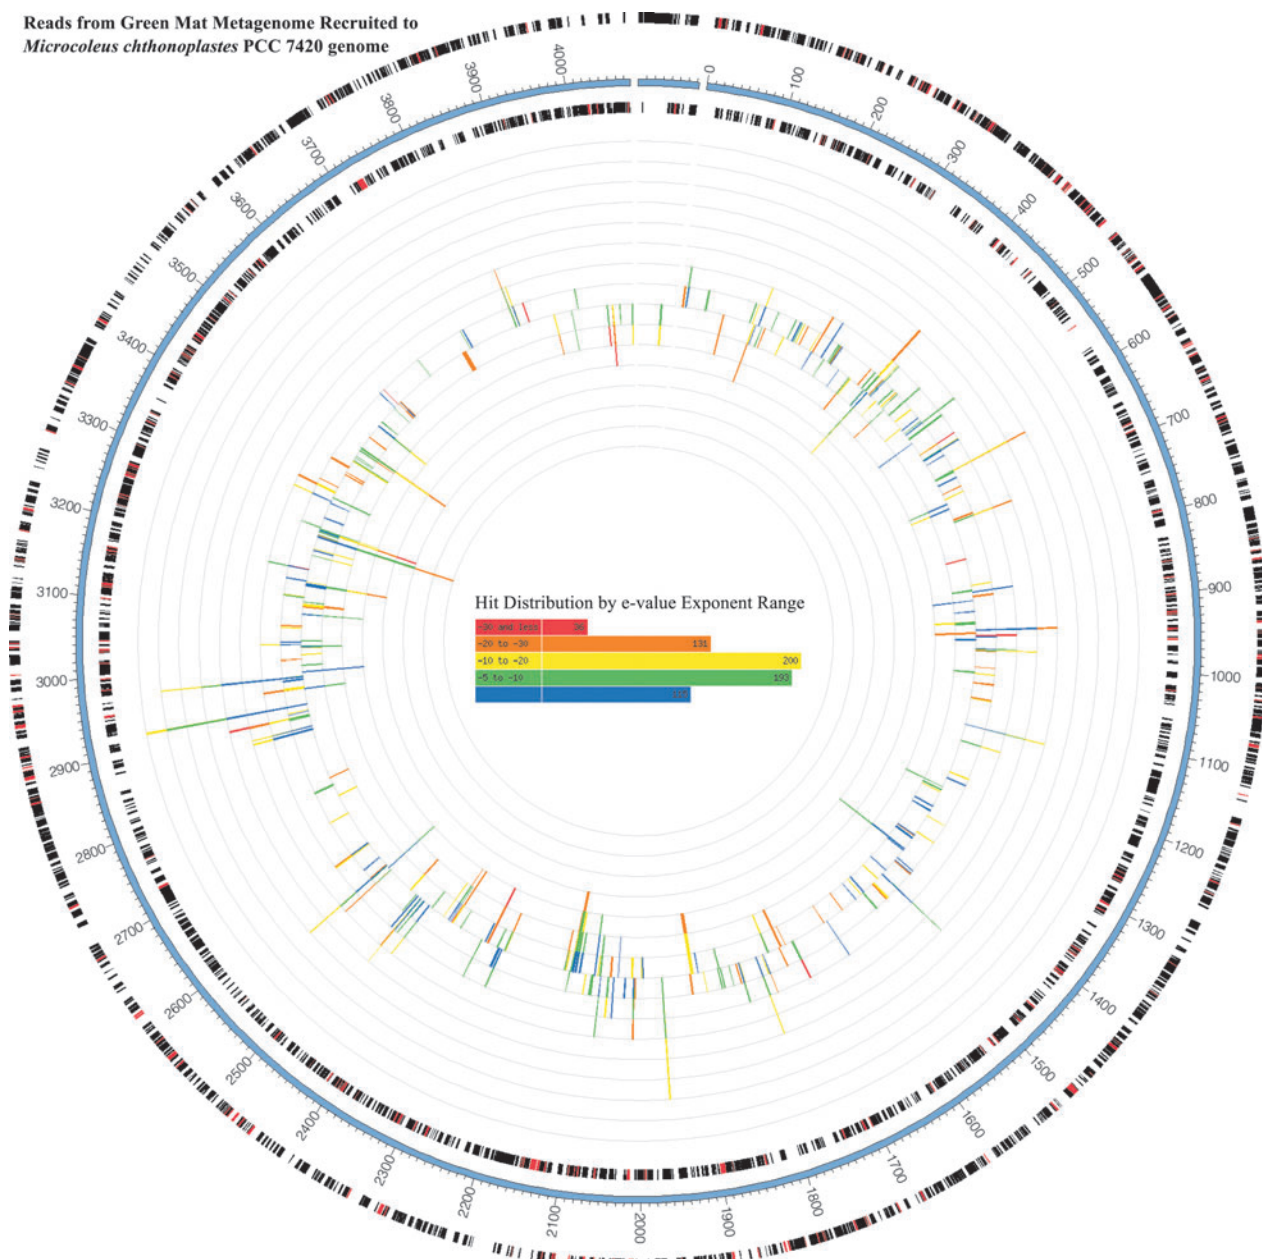

FIG. S3. (Continued).

Reads from Green Mat Metagenome Recruited to  
*Synechococcus* JA-2-3B'a genome

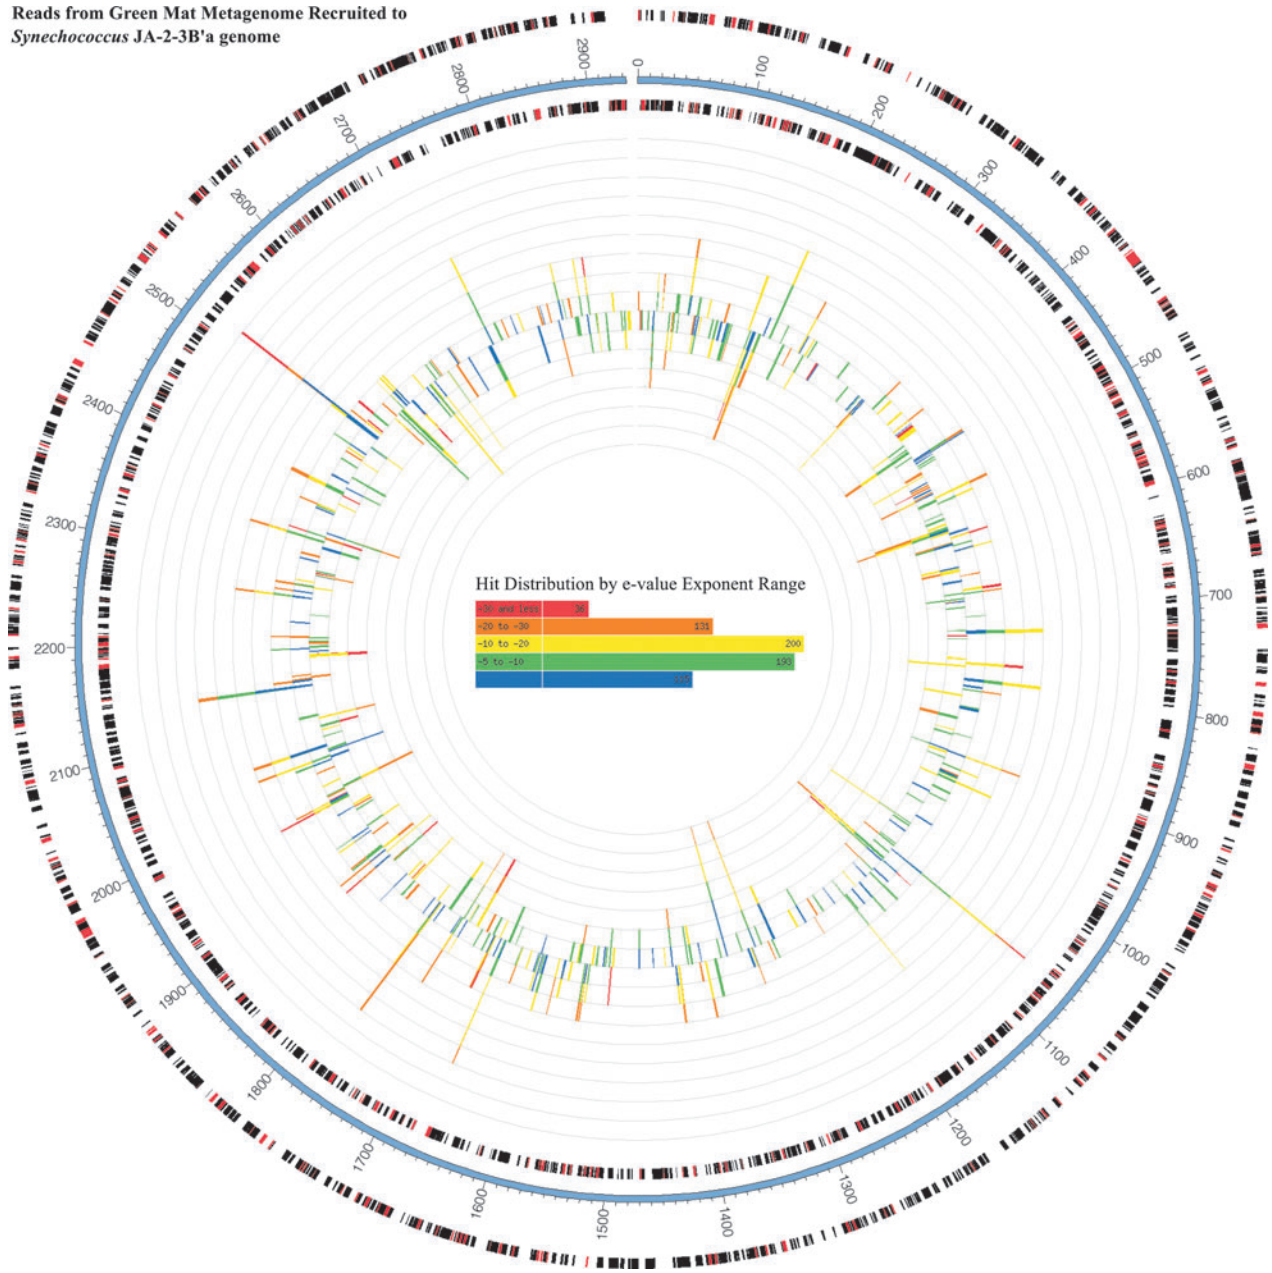

FIG. S3. (Continued).

Reads from Red Mat Metagenome Recruited to *Janthinobacterium* sp. Marseille genome

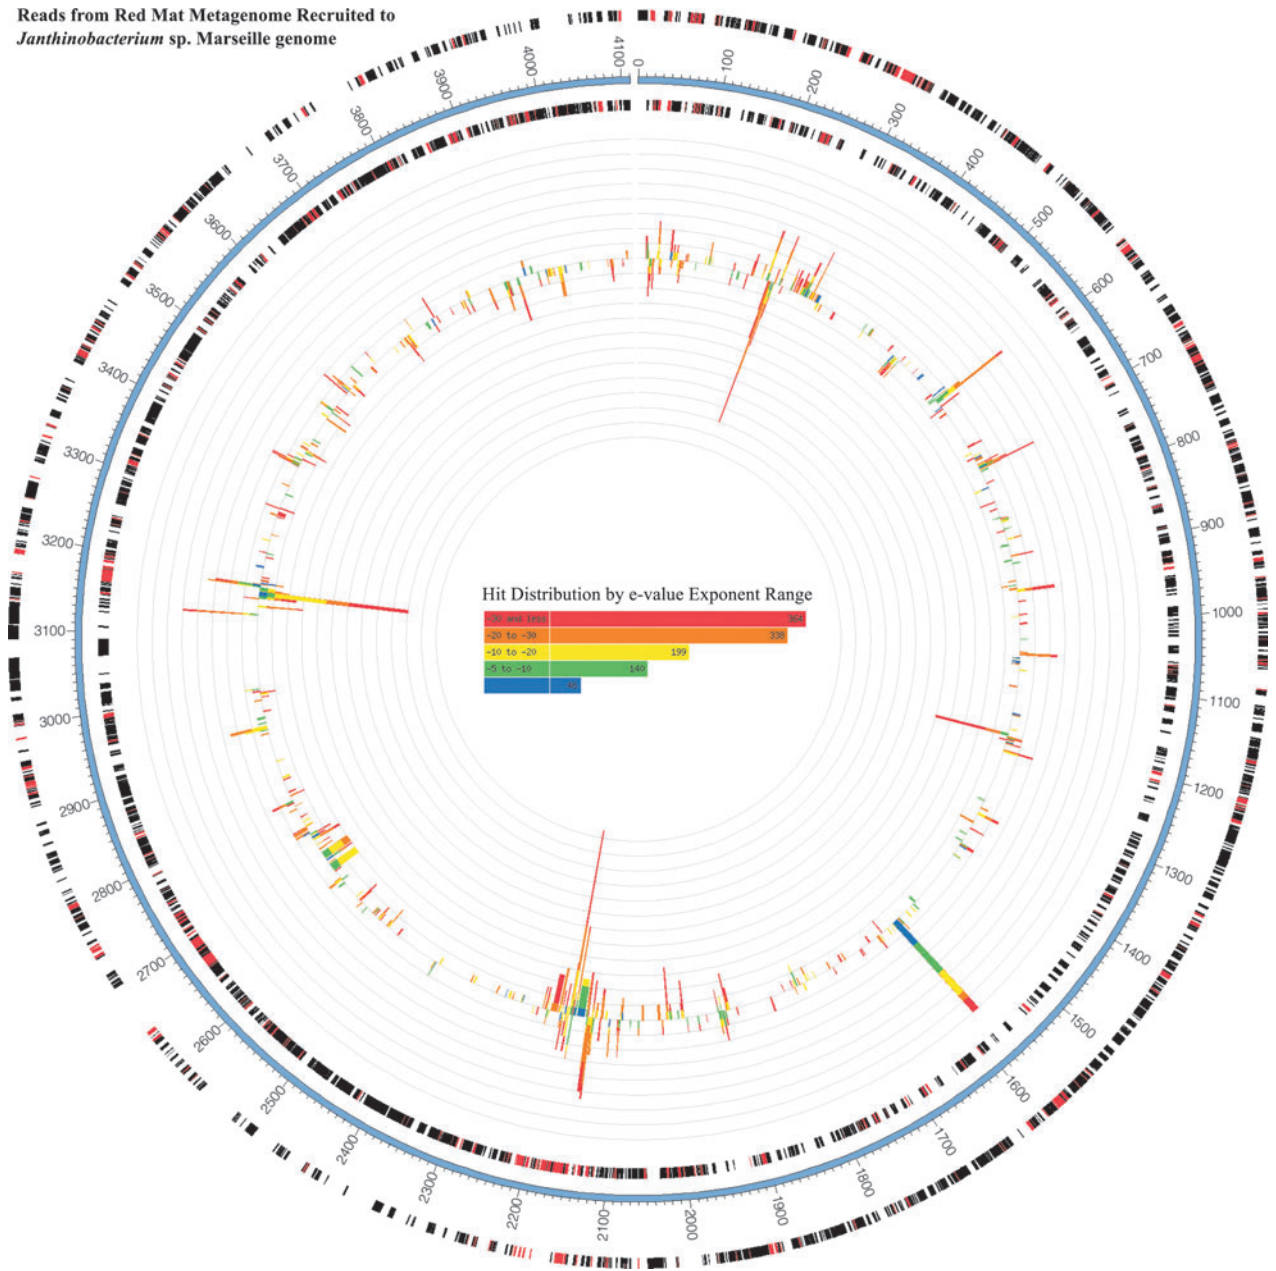

FIG. S3. (Continued).

Reads from Red Mat Metagenome Recruited to  
*Microcoleus chthonoplastes* PCC 7420 genome

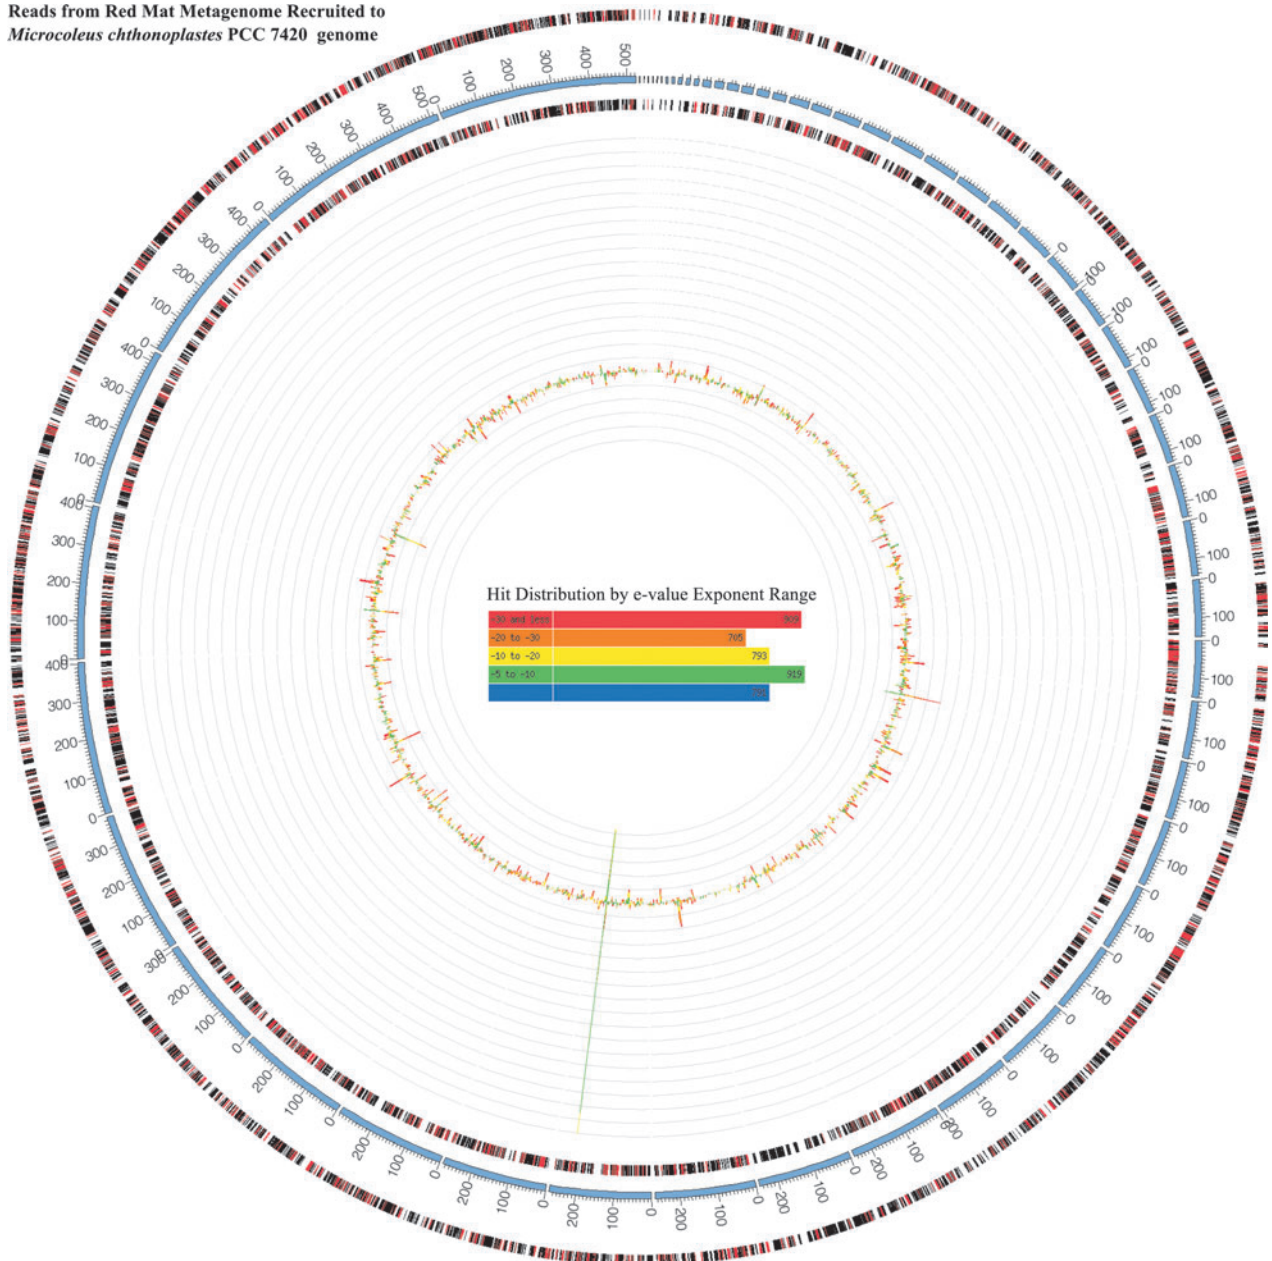

FIG. S3. (Continued).



Reads from Red Mat Metagenome Recruited to *Pseudomonas fluorescens* Pf0-1 genome

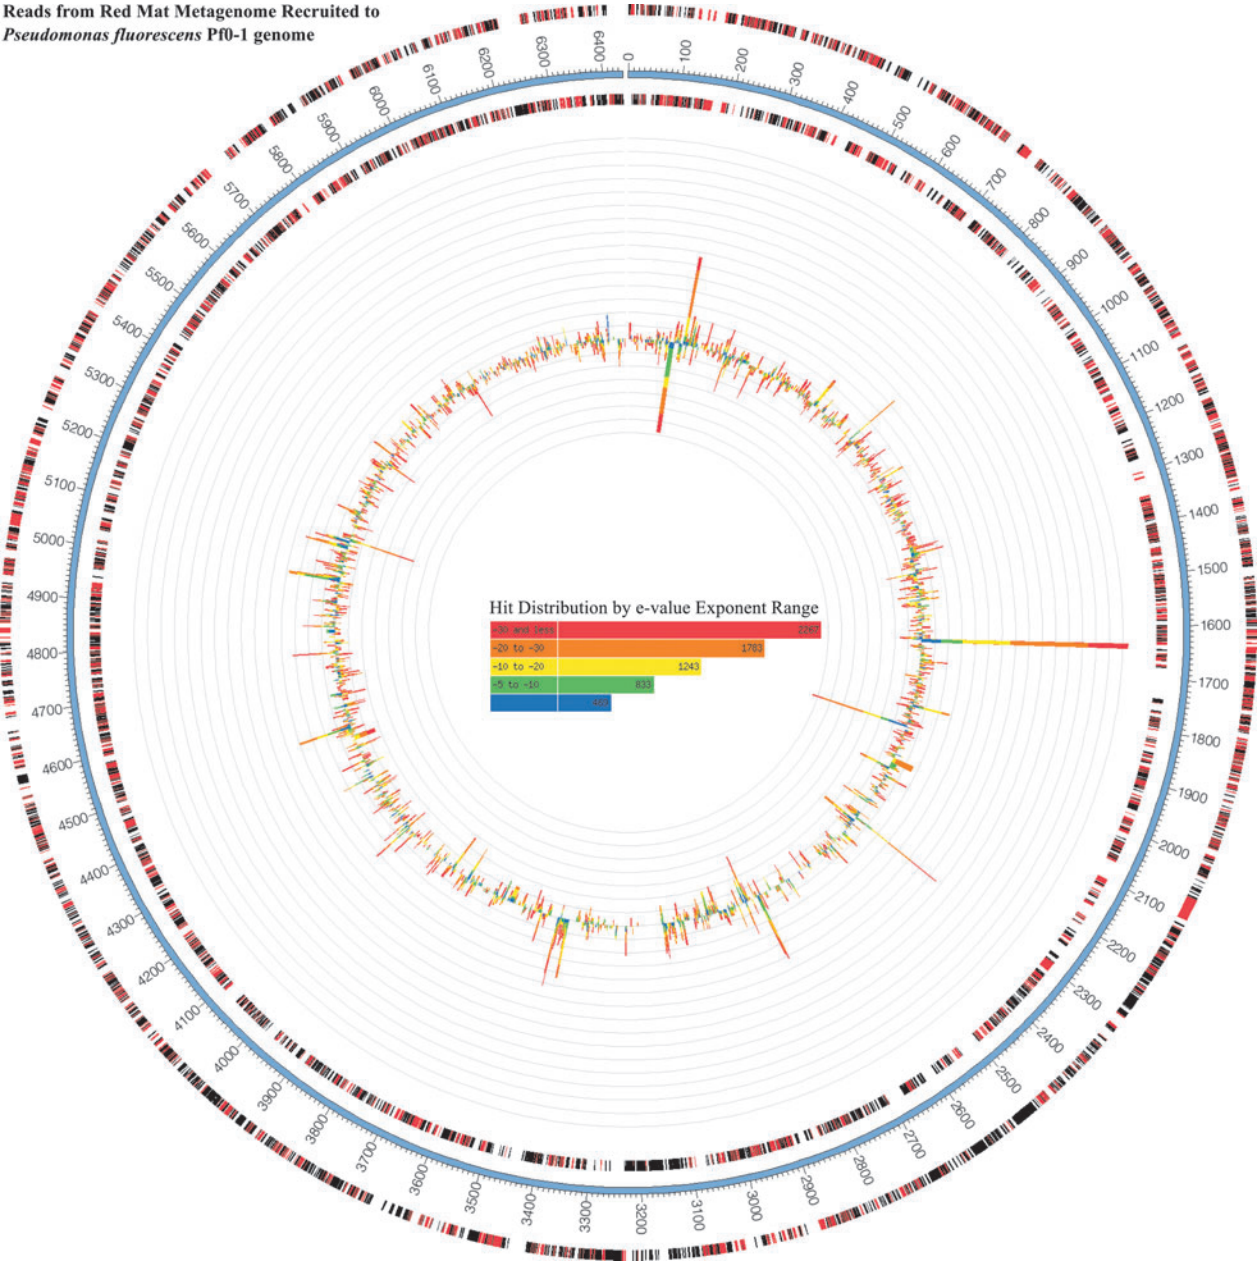

FIG. S3. (Continued).

Reads from Red Mat Metagenome Recruited to *Sphingopixis alaskensis* RB2256 genome

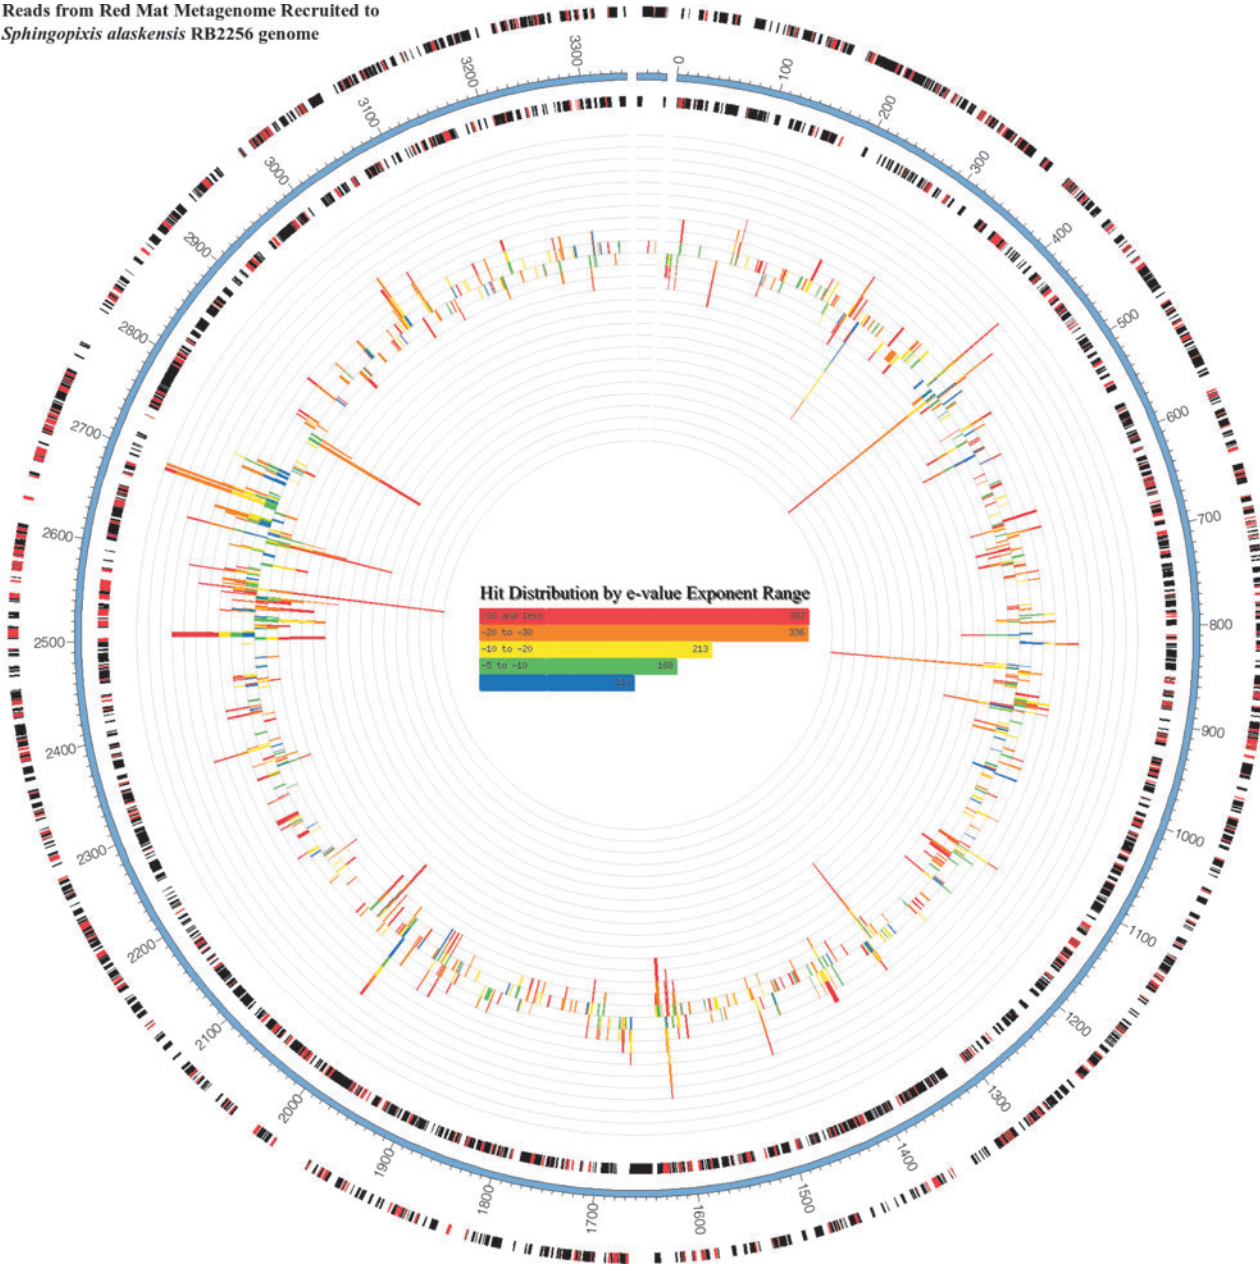

FIG. S3. (Continued).

## GLOSSARY OF ECOLOGICAL TERMS

**Community:** A collection of species occupying the same space at the same time and hence interacting between them. It is defined in terms of its structure and composition.

**Community Structure:** The proportion of each species in a community, measured by species abundances.

**Community Composition:** The taxonomic component of a community.

**Copiotrophic:** An environment with very high nutrient levels, or *copiotroph*: an organism that optimally grows and develops under high nutrient availability.

**Disturbance:** “A temporally discrete events which abruptly kill or displace individuals, or that directly result in a loss of biomass from a system” according to Grime, 1973.

**Diversity:** A measure of the variability of organisms in a community. Its two main components are species richness and species abundances.

**Functional Traits:** A well-defined measurable property of organisms linked to their performance.

**Functional Guild:** Group of organisms with similar (not necessarily identical) nutritional and metabolic characteristics and broadly perform the same ecological function.

**Oligotrophic :** An environment with very low nutrient levels, or *oligotroph*: an organism that is able to grow and develop with minimal nutrient requirements.

**Species richness:** The number of different species in a community.

**Species abundances:** The distribution of the relative proportion of the individuals in each species in a community. This varies from a high-evenness community where all species have exactly the same number of individuals, to a high-dominance community where a single species contains all the individuals of a community.

**FIG. S4.** Ecological appendix: (a) Glossary of ecological terms, (b) interpretation of the diversity metrics used in this study and (c) guide to the interpretation of Renyi profiles.

| METRIC          | EQUATION                                                                           | TERMS                                                                                                                                                                                        | MEANING                                                                             |
|-----------------|------------------------------------------------------------------------------------|----------------------------------------------------------------------------------------------------------------------------------------------------------------------------------------------|-------------------------------------------------------------------------------------|
| Chao            | $E_{(s)} = S_o + \frac{f_1^2}{2f_2}$                                               | $S_o$ = Observed number of species<br>$f_1$ = Number of species observed once<br>$f_2$ = Number of species observed twice                                                                    | The total number of species as expected from the sampling of rare species           |
| Rarefaction     | $E_{(s)} = \sum_{i=1}^s (1 - q_i)$ $q_i = \frac{\binom{N - x_i}{n}}{\binom{N}{n}}$ | $N$ = Total number of individuals<br>$n$ = Number of individuals in sample<br>$x_i$ = individuals from species $i$<br>$q_i$ = Probability that species $i$ does not occur at sample size $n$ | The expected total number of species as a function of the individuals sampled       |
| Shannon         | $H = - \sum_{i=1}^s p_i \ln(p_i)$                                                  | $p_i$ = Number of individuals in species $i$<br>$S$ = Total number of species                                                                                                                | A measure that incorporates both the number of species and their abundance          |
| Simpson         | $D = \sum_{i=1}^s p_i^2$                                                           | $p_i$ = Number of individuals in species $i$<br>$S$ = Total number of species                                                                                                                | A measure of dominance: probability that two individuals belong to the same species |
| Renyi's Profile | $H_\alpha = \frac{\ln \left( \sum_{i=1}^s p_i^\alpha \right)}{1 - \alpha}$         | $p_i$ = Number of individuals in species $i$<br>$S$ = Total number of species<br>$\alpha$ = Scale parameter                                                                                  | A family of diversity quantifiers giving different weight to richness and abundance |

FIG. S4. (Continued).

| METRIC           | EQUATION                                                                                                                                          | TERMS                                                                                                                                                                                                                                                                                                                                           | MEANING                                                                                       |
|------------------|---------------------------------------------------------------------------------------------------------------------------------------------------|-------------------------------------------------------------------------------------------------------------------------------------------------------------------------------------------------------------------------------------------------------------------------------------------------------------------------------------------------|-----------------------------------------------------------------------------------------------|
| Sorensen         | $D_S = 1 - \frac{2S_{AB}}{S_A + S_B}$                                                                                                             | $S_{AB}$ = Number of species shared between communities A and B<br>$S_A$ = Number of species in A<br>$S_B$ = Number of species in B                                                                                                                                                                                                             | A measure of the similarity based on species composition                                      |
| Morisita-Horn    | $D_{MH} = 1 - 2 \frac{\sum (\frac{S_{A,i}}{n})(\frac{S_{B,i}}{m})}{\sum (\frac{S_{A,i}}{n})^2 \sum (\frac{S_{B,i}}{m})^2}$                        | $S_{A,i}$ = Number of individuals from species $i$ in community A<br>$S_{B,i}$ = Number of individuals from species $i$ in community B<br>$n$ = Total individuals in A<br>$m$ = Total individuals in B                                                                                                                                          | A measure of similarity based on species composition and abundance                            |
| UniFrac          | $U = \frac{\sum_{i=1}^N l_i  A_i - B_i }{\sum_{i=1}^N l_i \max(A_i, B_i)}$                                                                        | $l_i$ = branch length between node $i$ and its parental node<br>$A_i$ = Binary indicator of the presence or absence of node $i$ in sample A<br>$B_i$ = Binary indicator of the presence or absence of node $i$ in sample A                                                                                                                      | A measure of similarity based on the phylogenetic distance between members of two communities |
| Weighted UniFrac | $W = \frac{\sum_{i=1}^N l_i \left  \frac{A_i}{A_T} - \frac{B_i}{B_T} \right }{\sum_{j=1}^N L_j \left( \frac{A_j}{A_T} + \frac{B_j}{B_T} \right)}$ | $l_i$ = branch length between tip node $i$ and its parental node<br>$L_j$ = Total branch length from the root to tip node $i$<br>$A_i$ = Number of tip nodes in A that descend from node $j$<br>$B_i$ = Number of tip nodes in B that descend from node $j$<br>$A_T$ = Total number of tip nodes in A<br>$B_T$ = Total number of tip nodes in B | A measure of similarity based on phylogenetic distance and relative abundance                 |

FIG. S4. (Continued).

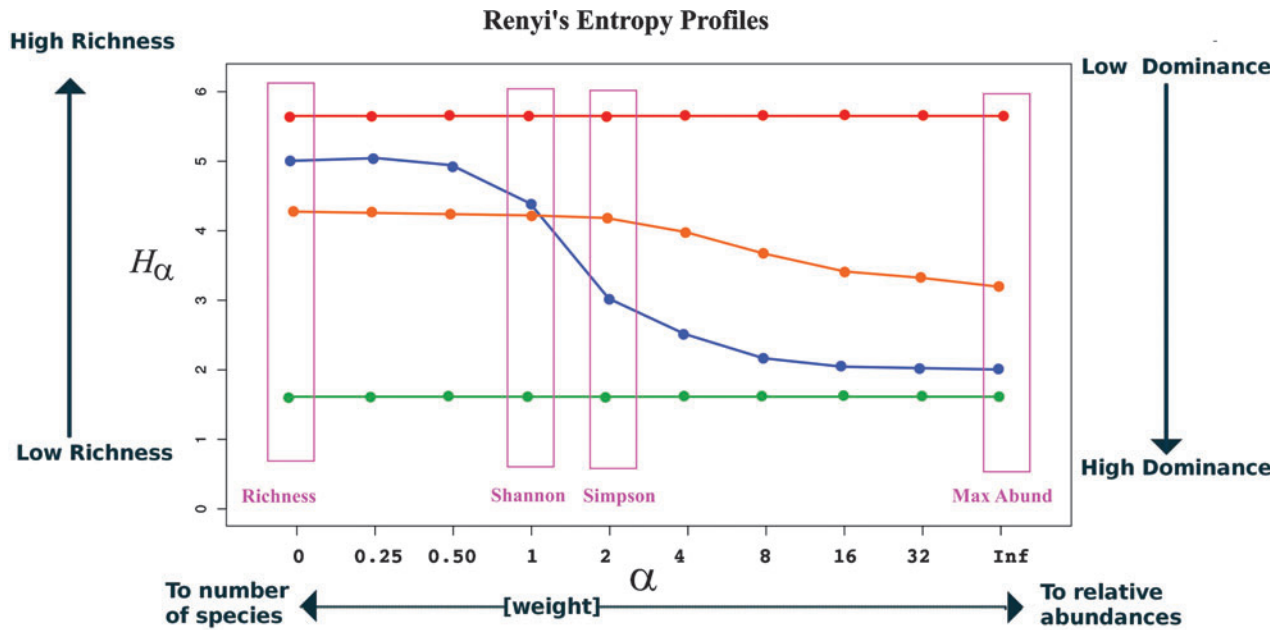

Renyi's Entropy profiles were developed as an extension of Shannon's entropy index to a scaling series that gives increasing weight to the relative abundance of species and decreasing weight to the number of species in a community. Common diversity indices are single moments of this function. In this sense, a measure of species richness is given when the scaling parameter equals to zero ( $\alpha = 0$ ); Shannon's index is given when  $\alpha = 1$ ; Simpson's index is given when  $\alpha = 2$ ; and the relative abundance of the most abundant species (the proportion of the most dominant species) is given when  $\alpha$  tends to infinity.

In a profile plot, a community is more diverse if it is higher in the plot, with more richness as it is higher on the left side and less dominant as it gets higher on the right side. In theory, a community can be called more diverse than another if each and every of the points along its profile line are above the points of the other communities (red profile in the figure above), and a community will be less diverse if all points are below the others (green profile). When profiles intersect, they can not be ranked in total diversity, since the one with higher points on the left side (blue profile) has more species, but it will be more dominated by few species than its intersect (orange profile). The latter will have less species since it has lower points on the left side, but its individuals will be more evenly distributed across all species.

FIG. S4. (Continued).
